# Supplementary material
Source: PubMed Central journal article supplement (PMC6066196)
Supplement: Supp_Fig1.pdf [file Supp_Fig1.pdf]

## Supplementary Data

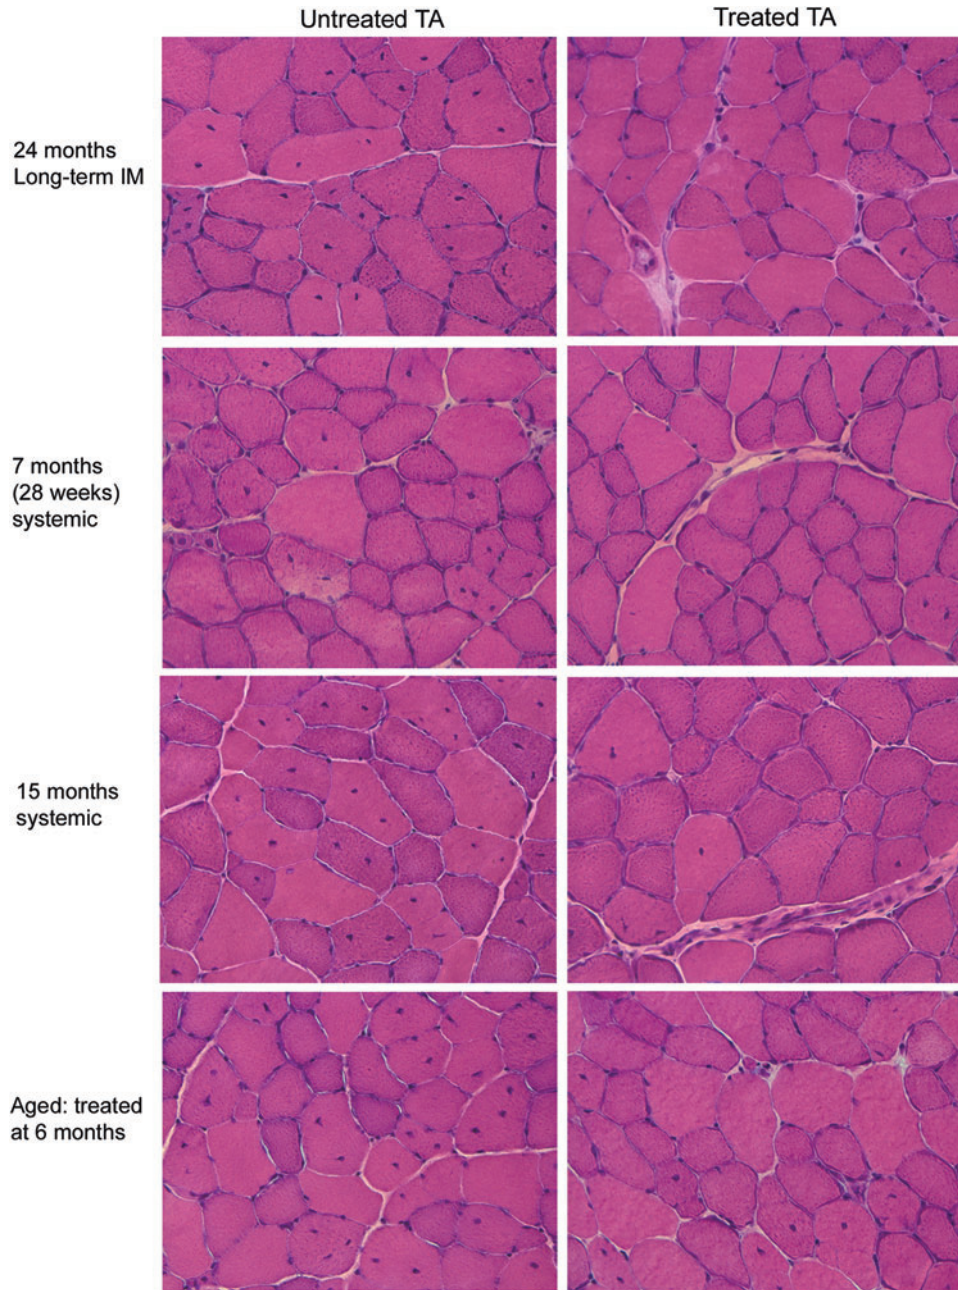

**Supplementary Figure S1.** High magnification images (40 $\times$ ) of BlaJ-untreated and AAVrh74.MHCK7.DV.DYSF-treated tibialis anterior muscles 24 months following intramuscular delivery, 7 and 15 months following systemic delivery at 8 weeks, and 3 months following systemic delivery of aged mice treated at 6 months of age.

---
