# Supplementary material
Source: PubMed Central journal article supplement (PMC6066196)
Supplement: Supp_Table1.pdf [file Supp_Table1.pdf]

**Supplementary Table 1.** *ELISA-positive titers of circulating binding antibodies to AAVrh74 vector capsid*

| <i>Weeks post injection</i> | <i>AAVrh74.DYSF.DV RQ8623</i> |
|-----------------------------|-------------------------------|
| 0                           | <5                            |
| 2                           | 800                           |
| 4                           | 800                           |
| 6                           | 204,800                       |
| 8                           | 409,600                       |
| 10                          | 204,800                       |
| 12                          | 204,800                       |

Serum was isolated from primates biweekly and analyzed for binding antibody titer. Titer reported corresponds to last dilution at which ratio of response  $\geq 2$ .
