# Supplementary material
Source: PubMed Central journal article supplement (PMC6066196)
Supplement: Supp_Table2.pdf [file Supp_Table2.pdf]

**Supplementary Table 2.** *Nonhuman primate complete blood count and chemistries following systemic injection with AAVrh74.MHCK7.DV.DYSF*

|                 |           | Baseline<br>value | 24 h post<br>value | 1 week<br>value | 2 weeks<br>value | 4 weeks<br>value | 9 weeks<br>value | 10 weeks<br>value | 12 weeks<br>value | Reference<br>values |
|-----------------|-----------|-------------------|--------------------|-----------------|------------------|------------------|------------------|-------------------|-------------------|---------------------|
| Albumin         | g/dL      | 4.9               | 4.6                | 4.7             | 4.4              | 4.5              | 4.2              | 4.4               | 4.2               | 3.64–4.5            |
| Alk phosphatase | IU/L      | 113               | 105                | 115             | 107              | 118.0            | 79               | 90                | 104.0             | 495–1,415           |
| ALT             | IU/L      | 28                | 52                 | 73              | 36               | 12.0             | 87               | 109               | 128.0             | 7.9–63.5            |
| Amylase         | IU/L      | 377               | 704                | 414             | 504              | 360.0            | 333              | 423               | 375.0             | 333–609             |
| AST             | IU/L      | 57                | 145                | 56              | 56               | 52.0             | 59               | 65                | 59.0              | 18–46               |
| BUN             | mg/dL     | 18                | 17                 | 18              | 14               | 13.0             | 15               | 16                | 15.0              | 9–24                |
| Calcium         | mg/dL     | 9.5               | 9.5                | 9.5             | 9.4              | 9.0              | 9.2              | 9.4               | 9.0               | 7.4–10.6            |
| Cholesterol     | mg/dL     | 134               | 126                | 172             | 160              | 137.0            | 129              | 128               | 108.0             | 99–154              |
| CK              | IU/L      | 126               | 768                | 91              | 1045             | 146.0            | 269              | 48                | 162.0             | 0–654               |
| Chloride        | mmol/L    | 105               | 104                | 104             | 105              | 105.0            | 107              | 107               | 106.0             | 103–110             |
| Creatinine      | mg/dL     | 0.96              | .89                | 0.95            | 0.86             | 0.84             | 0.72             | 0.74              | 0.76              | 0.5–0.9             |
| GGTP            | IU/L      | 82                | 76                 | 75              | 66               | 77               | 69               | 75                | 87                | 53–92               |
| Glucose         | mg/dL     | 65                | 71                 | 74              | 69               | 76               | 64               | 63                | 75                | 42–129              |
| Potassium       | mmol/L    | 3.5               | 3.9                | 3.2             | 3.7              | 3.1              | 3.6              | 3.4               | 2.9               | 3.13–4.01           |
| Lipase          | IU/L      | 64                | 362                | 93              | 141              | 62.0             | 90               | 103               | 86.0              | 18.8–36.2           |
| Magnesium       | mg/dL     | 1.5               | 1.5                | 1.7             | 1.7              | 1.5              | 1.5              | 1.6               | 1.7               | 1.38–1.6            |
| Sodium          | mmol/L    | 153               | 152.0              | 152             | 152              | 149.0            | 152              | 150               | 149.0             | 141–149             |
| Osmolality      | mosmol/kg | 313               | 309                | 314             | 308              | 301.0            | 304              | 305               | 304.0             | 300–315             |
| Phosphorus      | mg/dL     | 5.0               | 4.6                | 5.2             | 5.1              | 5.3              | 4.6              | 5.0               | 3.9               | 3.9–5.9             |
| Protein, total  | g/dL      | 8.2               | 8.1                | 8.4             | 8.0              | 7.9              | 7.8              | 8.0               | 7.5               | 6.0–7.2             |
| Total bilirubin | mg/dL     | 0.2               | 0.5                | 0.1             | 0.1              | 0.5              | 0.0              | 0.2               | 0.2               | 0.29–0.51           |
| Triglycerides   | mg/dL     | 81                | 42                 | 58              | 55               | 51.0             | 76               | 86                | 86.0              | 19.7–113.9          |
| WBC             | K/cu mm   | 12.3              | 6.4                | 8.2             | 6.8              | 6.2              | 7.0              | 7.1               | 6.9               | 5.3–10.6            |
| RBC             | M/cu mm   | 5.65              | 5.43               | 5.49            | 5.0              | 5.06             | 5.22             | 5.19              | 5.06              | 4.49–5.51           |
| Hemoglobin      | g/dL      | 14.1              | 13.5               | 13.7            | 12.3             | 12.7             | 13.0             | 13.1              | 12.8              | 10.5–13.6           |
| Hematocrit      | %         | 43.7              | 41.6               | 42.7            | 39.2             | 39.8             | 41.3             | 41.2              | 39.9              | 31.6–39.3           |
| MCV             | fL        | 77.3              | 76.6               | 77.8            | 78.4             | 78.7             | 79.1             | 79.4              | 78.9              | 66–76               |
| MCH             | pg        | 25                | 24.9               | 25              | 24.6             | 25.1             | 24.9             | 25.2              | 25.3              | 21.83–26.85         |
| MCHC            | %         | 32.3              | 32.5               | 32.1            | 31.4             | 31.9             | 31.5             | 31.8              | 32.1              | 31–37               |
| RDW             | %         | 12.9              | 13.1               | 13.3            | 13.6             | 13.7             | 13.1             | 13.0              | 13.2              | 12.23–13.85         |
| Platelet count  | K/cu mm   | 261               | 266                | 335             | 283.0            | 309.0            | 307              | 307               | 305               | 180.19–415.17       |
| MPV             | fL        |                   | 11.2               | 11.1            | 11.6             | 11.6             | 10.6             | 10.9              | 10.7              | 7.5–11.5            |
| Neutrophil      | %         |                   |                    |                 |                  |                  |                  |                   |                   | 16.36–36.06         |
| Lymphocyte      | %         | 26                | 27.0               | 51.0            | 53.0             | 48.0             | 33               | 42                | 34.0              | 53–74.3             |
| Monocyte        | %         | 4.0               | 6                  | 6               | 6.0              | 2.0              | 9                | 2                 | 4.0               | 4.23–10.1           |
| Eosinophil      | %         | 1.0               |                    |                 | 4.0              | 0.0              | 1                |                   |                   | 0.2–2.44            |
| Basophil        | %         |                   |                    | 2.0             |                  | 0.0              |                  |                   |                   | 0.28–0.88           |
| Seg             | %         | 60                | 67                 | 44              | 34               | 50               | 57               | 56                | 63                | 0–1                 |
| Stomatocytes    |           |                   |                    |                 |                  |                  |                  |                   |                   | 3.64–4.5            |

Serum was isolated from primates biweekly, and CBC and chemistries were analyzed. Normal reference ranges for male rhesus macaques are included.
